# Supplementary material for: Identification of anti-inflammatory components of raw and steamedPanax notoginsengroot by analyses of spectrum-effect relationship
Source: Royal Society of Chemistry journal article supplement (doi:10.1039/c9ra00906j), 2019-01-01
Supplement: c9ra00906j1.pdf [file c9ra00906j1.pdf]

## Identification of anti-inflammatory components of raw and steamed *Panax notoginseng* root by analyses of spectrum-effect relationship<sup>†</sup>

Zejun Zhang<sup>a, b, c, §</sup>, Lijuan Chen<sup>a, §</sup>, Xiuming Cui<sup>a, b, c, §</sup>, Yiming Zhang<sup>a</sup>, Yupiao Hu<sup>a</sup>, Chengxiao Wang<sup>a</sup>, Yin Xiong<sup>a, d\*</sup>

<sup>a</sup> Faculty of Life Science and Technology, Kunming University of Science and Technology, Kunming 650500, China. *E-mail*: 18380802826@163.com.

<sup>b</sup> Yunnan Key Laboratory of *Panax notoginseng*, Kunming University of Science and Technology, Kunming 650500, China.

<sup>c</sup> Laboratory of sustainable utilization of *Panax notoginseng* Resources, Kunming University of Science and Technology, Kunming 650500, China.

<sup>d</sup> LU-European Center for Chinese Medicine, Leiden University, Leiden 2333BE, The Netherlands.

\* Corresponding Author: *yhsiung@163.com*.

§ These authors contributed equally to this work.

### Supplementary Materials

**Table S1.** The information and peak area of fifteen common peaks in PN samples<sup>1</sup>

| Sample    | NO. | Peak area of each peak |        |       |       |       |        |       |      |       |       |       |      |      |       |       |
|-----------|-----|------------------------|--------|-------|-------|-------|--------|-------|------|-------|-------|-------|------|------|-------|-------|
|           |     | 1 <sup>a</sup>         | 2      | 3     | 4     | 5     | 6      | 7     | 8    | 9     | 10    | 11    | 12   | 13   | 14    | 15    |
| RPN 1     | S1  | 360.                   | 1348.8 | 98.2  | 93.2  | 85.7  | 727.1  | 229.3 | 59.7 | 0     | 0     | 0     | 0    | 0    | 0     | 0     |
| RPN 2     | S2  | 337.                   | 1304.7 | 94.2  | 89.6  | 84.1  | 427.8  | 262.3 | 24.8 | 0     | 0     | 0     | 0    | 0    | 0     | 0     |
| RPN 3     | S3  | 560.                   | 1435.1 | 108.4 | 173.2 | 173.8 | 1356.8 | 462.3 | 24.8 | 0     | 0     | 0     | 0    | 0    | 0     | 0     |
| 105°C-2h  | S4  | 430.                   | 1347.6 | 68.5  | 109.1 | 161   | 828.6  | 246.5 | 42.1 | 29.2  | 66.1  | 133.1 | 0    | 0    | 0     | 56.6  |
| 105°C-4h  | S5  | 321.                   | 1182.1 | 134.8 | 121.9 | 191.9 | 759.7  | 234.3 | 59.9 | 101.9 | 167.4 | 252.2 | 38.7 | 0    | 49.3  | 108.2 |
| 105°C-6h  | S6  | 251.                   | 1003.3 | 94.8  | 113.6 | 221.1 | 831.5  | 290.5 | 97.4 | 106.9 | 266.1 | 423.1 | 76.6 | 38.9 | 58.5  | 215.1 |
| 105°C-8h  | S7  | 267                    | 789.5  | 69.4  | 143.9 | 300.5 | 566.7  | 185   | 66.3 | 221.9 | 398.7 | 609   | 87.1 | 39.6 | 79.4  | 283.4 |
| 105°C-10h | S8  | 199.                   | 685.2  | 78    | 147.8 | 341.9 | 704.8  | 226.3 | 92.2 | 230.8 | 465.1 | 709.7 | 125. | 53.4 | 110.9 | 373.6 |
| 110°C-2h  | S9  | 282.                   | 1160   | 109.7 | 104.3 | 176.8 | 821.1  | 232.6 | 93.6 | 57.7  | 153.1 | 266   | 35.1 | 0    | 0     | 102   |

|                       |     |      |        |      |       |       |       |       |      |       |        |        |      |       |       |        |
|-----------------------|-----|------|--------|------|-------|-------|-------|-------|------|-------|--------|--------|------|-------|-------|--------|
| 110°C-4h              | S10 | 201. | 1021.8 | 74.8 | 85.5  | 22.9  | 687.6 | 207.5 | 99   | 97.5  | 308.5  | 521.9  | 87.8 | 31.6  | 0     | 229    |
| 110°C-6h              | S11 | 172. | 781    | 71.6 | 132   | 402.8 | 634.5 | 194.2 | 68.5 | 201.5 | 581.5  | 873.3  | 136. | 56.5  | 185.1 | 418.4  |
| 110°C-8h              | S12 | 89.7 | 369.4  | 0    | 145.1 | 422.8 | 440   | 136.6 | 37.3 | 293.5 | 761.2  | 1136.9 | 173. | 79.8  | 256.9 | 559.7  |
| 110°C-10h             | S13 | 0    | 164.4  | 0    | 149.9 | 550.2 | 415.5 | 115.3 | 21.9 | 314.8 | 892.8  | 1373.8 | 274. | 149.2 | 346.9 | 759.4  |
| 120°C-2h              | S14 | 127. | 629.9  | 79.4 | 106   | 349.1 | 505   | 161.8 | 27.5 | 169.8 | 571.1  | 800.2  | 134. | 62.9  | 200.8 | 421    |
| 120°C-4h              | S15 | 0    | 168.2  | 0    | 190.3 | 426.7 | 407   | 133.7 | 31.3 | 477.8 | 821.6  | 1281.5 | 142. | 133.7 | 444.3 | 939.3  |
| 120°C-6h              | S16 | 0    | 0      | 0    | 110.3 | 474   | 249.1 | 52.8  | 0    | 331   | 1030.7 | 1641.7 | 279. | 135.6 | 709.8 | 1012.9 |
| 120°C-8h              | S17 | 0    | 0      | 0    | 110.8 | 409.4 | 174.4 | 44    | 0    | 371.9 | 1002.8 | 1557.7 | 316. | 153.4 | 642.1 | 1052.2 |
| 120°C-10h             | S18 | 0    | 0      | 0    | 97.1  | 230.6 | 196.8 | 0     | 0    | 368.3 | 1058.7 | 1748.3 | 293. | 150.7 | 532.3 | 1056.4 |
| C.V. <sup>b</sup> (%) |     | 81.1 | 67.4   | 75.5 | 23.1  | 52.4  | 46.6  | 53.9  | 70.2 | 76.7  | 77.6   | 78.0   | 85.6 | 95.6  | 114.7 | 88.8   |

<sup>a</sup>Peaks 1-15,<sup>b</sup> C.V. (%) =  $\delta / \mu \times 100$ ;  $\delta$  is the standard deviation,  $\mu$  is the average value of peak are.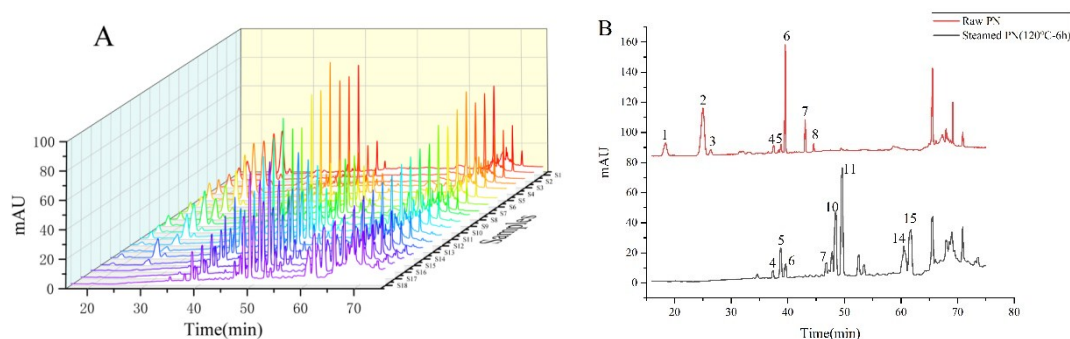

**Fig. S1** HPLC fingerprints (A) and the common peaks (B) of 18 batches of PN extracts.<sup>1</sup>

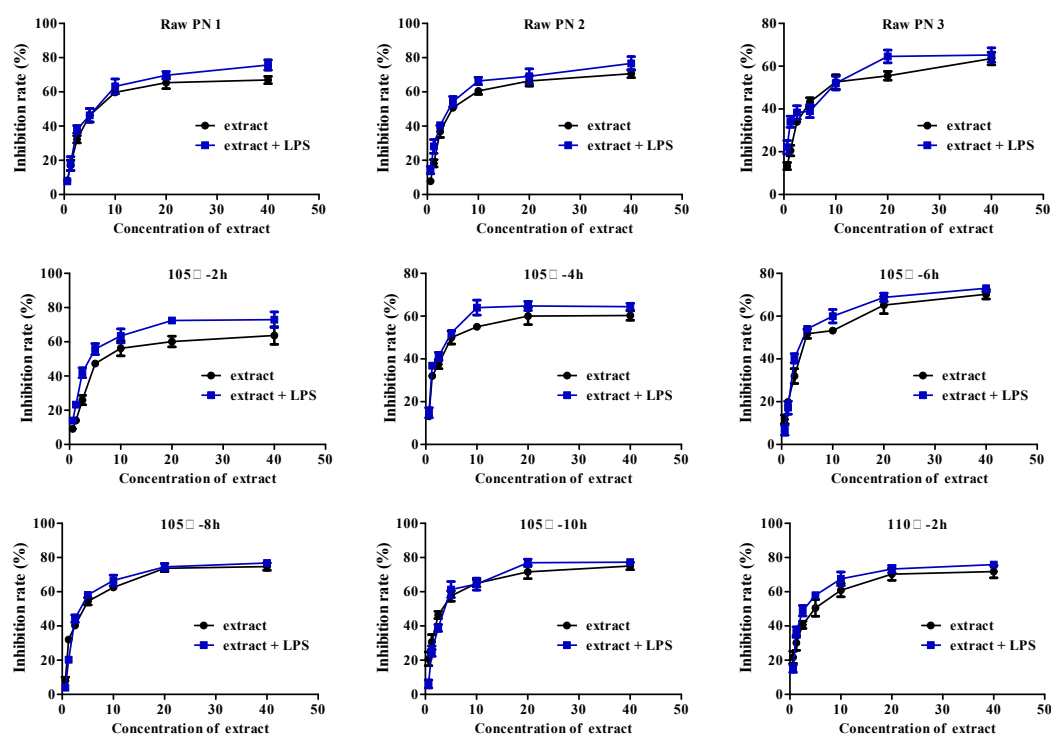

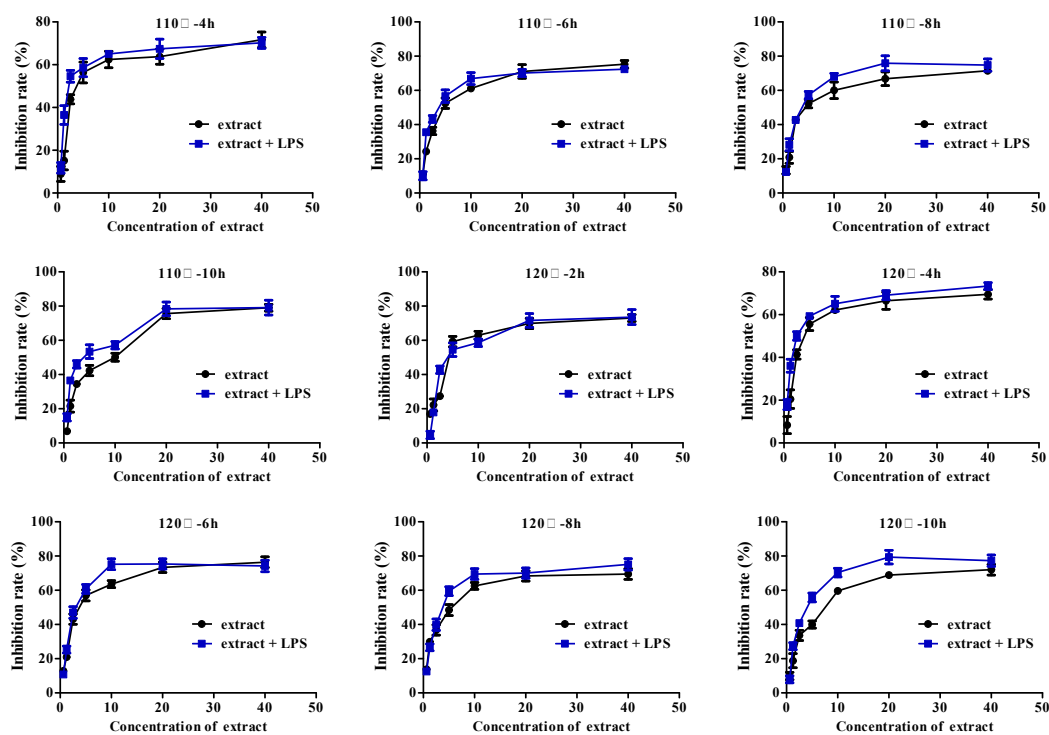

**Fig. S2** Inhibition of RPN, SPN, and LPS on the cell growth.

## references

- 1 Y. Xiong, L. J. Chen, Y. P. Hu and X. M. Cui, *Front. Pharmacol.*, 2017, **8**, DOI: 10.3389/fphar.2017.00745.
